# Supplementary material
Source: PubMed Central journal article supplement (PMC5010494)

## **SUPPLEMENTARY FIGURES**

**Supplementary Figure 1.** Subjects and single SNP exclusion schema for the GWAS

**Supplementary Figure 2.** Principal component plot for the genotyped IFM cohort and 3 HapMap phase III reference populations. The first two components are plotted, each sample is represented by a colored circle. Magenta: IFM samples; Red : IFM outliers; Pink: Utah residents with Northern and Western European ancestry from the CEPH collection (CEU); Green: Han Chinese in Beijing, China (CHB); Blue: Yoruba in Ibadan, Nigeria (YRI).

**Supplementary Figure 3.** OR for 6 SNPs associated with BiPN discovery study ; for each allele, OR and CI is drawn (left: 0 risk-allele, middle :1 risk-allele, right: 2 risk-allele).

**Supplementary Figure 4.** Manhattan plots for association analyses. Genome-wide association test results are shown as  $-\text{Log}_{10}$  transformed P-values . Chromosomal location of SNPs is indicated on the x-axis. The five candidate gene SNPs are indicated.

Supplementary Figure 1

French exploration study

Samples removed:  
n= 2 Contrast QC < 0.4  
n= 8 Call rate < 97%  
n= 3 Heterozygosity rate > mean het+3SD  
Samples remaining: 469  
155 cases/ 314 controls

482 subjects  
IFM MM cases (BiPN grade  $\geq 2$ )  
n = 160  
IFM MM controls (no BiPN and grade 1 BiPN)  
n = 322  
Human SNP 6.0: 909,622 SNPs

SNP removed:  
n= 130 Affymetrix unannotated  
n= 37,326 mitochondrial and sex chromosomes  
n=16,743 genotype undetermined (> 5% in subjects )  
n= 483,984 minor allele homozygous genotype (< 5% in subjects)  
n= 834 failed HW (<  $10^{-5}$  in subjects)  
SNPs remaining: n= 370,605

6 SNPs with P-value <  $10^{-5}$  to replication

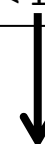

Dutch/ German replication study

1 SNP with P-value <  $10^{-2}$

Samples removed:  
n = 2 genotype failed  
Samples remaining : 114  
40 cases/ 74 controls

116 subjects  
Hovon MM cases (BiPN grade  $\geq 2$ )  
n = 41  
IFM MM controls (BiPN grade < 2)  
n = 75  
Human SNP 6.0: 909,622 SNPs

Supplementary Figure 2

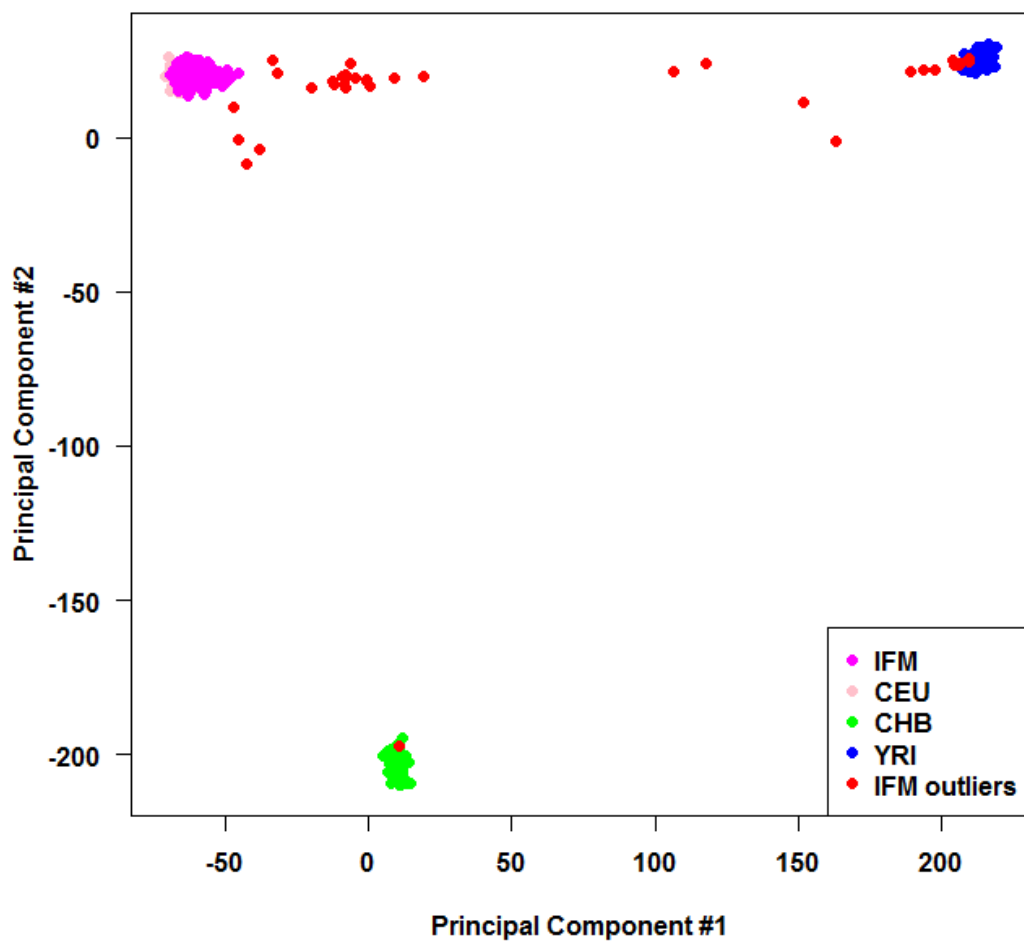

Supplementary Figure 3

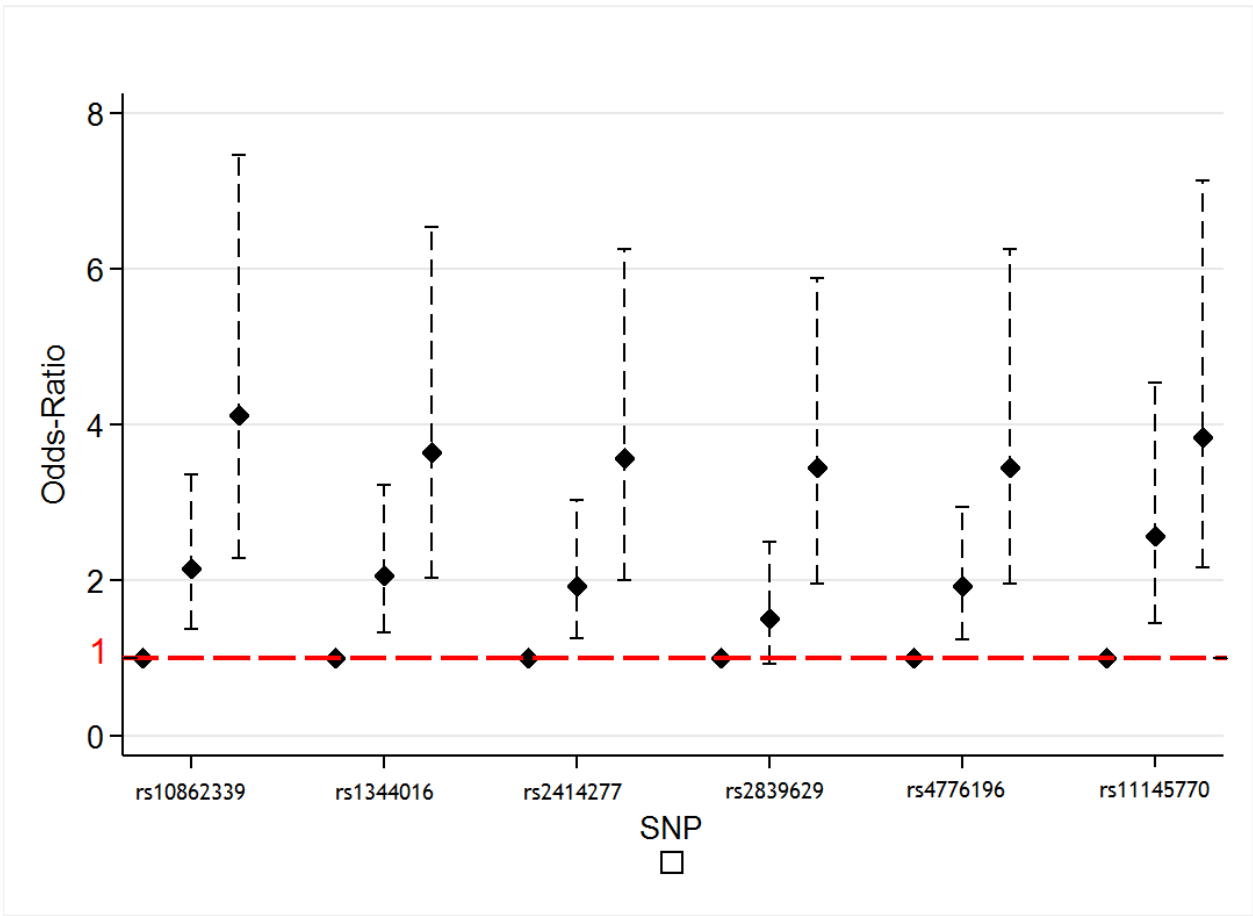

Supplementary Figure 4

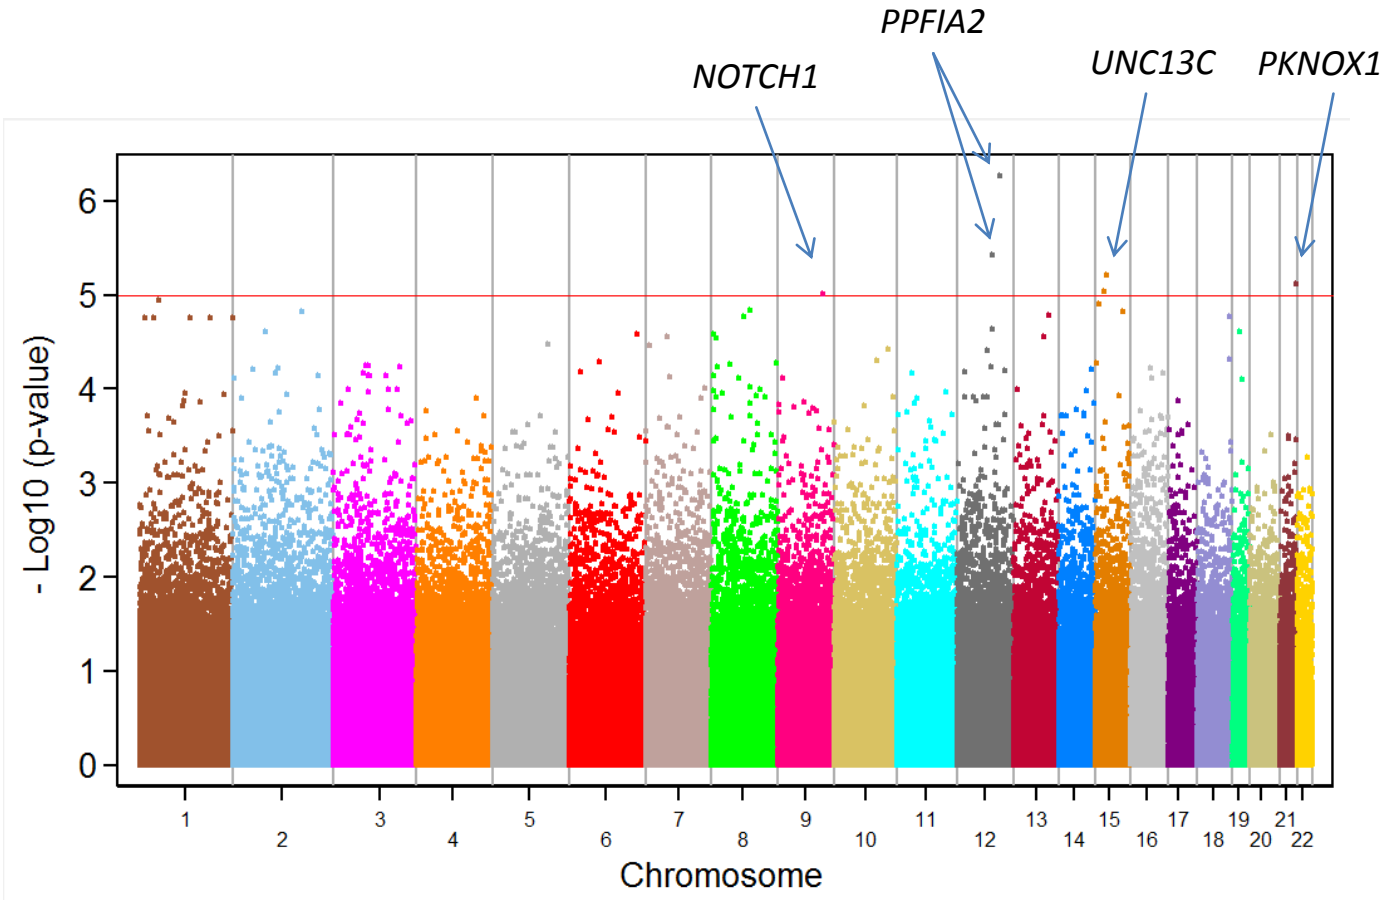

Supplement: NIHMS777012-supplement-1.pdf [file NIHMS777012-supplement-1.pdf]
