# Supplementary material
Source: PubMed Central journal article supplement (PMC5010494)
Supplement: NIHMS777012-supplement-2.pdf [file NIHMS777012-supplement-2.pdf]

Supplementary Table 1: Candidate Gene SNPs in the exploratory study

| <b>SNP</b>        | <b>Locus</b> | <b>Position</b> | <b>Gene</b>   | <b>SNP type</b> | <b>P-value</b>          |
|-------------------|--------------|-----------------|---------------|-----------------|-------------------------|
| <b>rs11145770</b> | 9q34.3       | 139427066       | <i>NOTCH1</i> | Intron          | 9.70 x 10 <sup>-6</sup> |
| <b>rs10862339</b> | 12q21.3      | 82076089        | <i>PPFIA2</i> | Intron          | 5.47 x 10 <sup>-7</sup> |
| <b>rs1344016</b>  | 12q21.3      | 82081470        | <i>PPFIA2</i> | Intron          | 3.81 x 10 <sup>-6</sup> |
| <b>rs4776196</b>  | 15q21.3      | 54264891        | -             | Intergenic      | 9.31 x 10 <sup>-6</sup> |
| <b>rs2414277</b>  | 15q21.3      | 54270793        | <i>UNC13C</i> | 5' UTR          | 6.17 x 10 <sup>-6</sup> |
| <b>rs2839629</b>  | 21q22.3      | 44453022        | <i>PKNOX1</i> | 3' UTR          | 7.64 x 10 <sup>-6</sup> |
