# Supplementary material
Source: PubMed Central journal article supplement (PMC5010494)
Supplement: NIHMS777012-supplement-3.pdf [file NIHMS777012-supplement-3.pdf]

Supplementary Table 2: rs2839629 functional annotations

## SNiPACard – rs2839629

SNP properties – Genome Assembly: grch37, Variant set: 1kgpp3v5, Population: EUR

rs2839629 (alias rs60091962, rs56533768, rs3746944)

| position / outlook    |                   | allele info          |             |
|-----------------------|-------------------|----------------------|-------------|
| physical position     | chr21: 44,453,022 | alleles              | G/A         |
| genetic position [cM] | 57.37             | frequencies          | 0.545/0.455 |
| outlink               | <i>e!</i>         | non-reference allele | A           |

## Basic features

| Conservation/deleteriousness |          | Linked genes                  |                                                  |
|------------------------------|----------|-------------------------------|--------------------------------------------------|
| phyloP                       | -2.733   | gene(s) hit or close-by       | PKNOX1 <i>e!</i>                                 |
| phastCons                    | 0        | eQTL gene(s)                  | CBS <i>e!</i> , CBS <i>e!</i> , PKNOX1 <i>e!</i> |
| GERP++                       | -7.94    | potentially regulated gene(s) | –                                                |
| CADD score                   | 1.122    | disease gene(s)               | CBS <i>e!</i> , CBS <i>e!</i>                    |
| SnpEff effect impact         | modifier |                               |                                                  |

## Trait annotations

## Disease gene annotation

| gene          | trait                                                        | source DB | source entry/link                                                                                  |
|---------------|--------------------------------------------------------------|-----------|----------------------------------------------------------------------------------------------------|
| CBS <i>e!</i> | HOMOCYSTINURIA DUE TO CYSTATHIONINE BETA-SYNTHASE DEFICIENCY | OMIM      | MIM:236200    |
| CBS <i>e!</i> | HOMOCYSTINURIA DUE TO CYSTATHIONINE BETA-SYNTHASE DEFICIENCY | OMIM      | MIM:236200    |
| CBS <i>e!</i> | cystathionine beta-synthase deficiency (CBSD)                | DECIPHER  | MIM:236200    |
| CBS <i>e!</i> | cystathionine beta-synthase deficiency (CBSD)                | DECIPHER  | MIM:236200    |
| CBS <i>e!</i> | Classical homocystinuria                                     | OrphaNet  | OrphaNet:394  |

## Direct effect on regulation

## cis-eQTL

| gene          | transcript                | probe                  | tissue | statistic (type)                 | source                                                                                                  |
|---------------|---------------------------|------------------------|--------|----------------------------------|---------------------------------------------------------------------------------------------------------|
| CBS <i>e!</i> | ENST00000398165 <i>e!</i> | ILMN_1804735 <i>e!</i> | skin   | $2.60 \times 10^{-15}$ (p-value) | MuTHER consortium  |
| CBS <i>e!</i> | ENST00000617706 <i>e!</i> |                        | blood  | $3.06 \times 10^{-8}$ (p-value)  | MuTHER consortium  |
| CBS <i>e!</i> | ENST00000462349 <i>e!</i> |                        |        |                                  |                                                                                                         |
| CBS <i>e!</i> | ENST00000352178 <i>e!</i> |                        |        |                                  |                                                                                                         |
| CBS <i>e!</i> | ENST00000624406 <i>e!</i> |                        |        |                                  |                                                                                                         |
| CBS <i>e!</i> | ENST00000359624 <i>e!</i> |                        |        |                                  |                                                                                                         |
| CBS <i>e!</i> | ENST00000461686 <i>e!</i> |                        |        |                                  |                                                                                                         |
| CBS <i>e!</i> | ENST00000618024 <i>e!</i> |                        |        |                                  |                                                                                                         |
| CBS <i>e!</i> | ENST00000398168 <i>e!</i> |                        |        |                                  |                                                                                                         |
| CBS <i>e!</i> | ENST00000624691 <i>e!</i> |                        |        |                                  |                                                                                                         |
| CBS <i>e!</i> | ENST00000398158 <i>e!</i> |                        |        |                                  |                                                                                                         |

## Putative effect on regulation

## Variation proximal to gene

| gene             | variant type            | distance | transcript                | RefSeq id | protein                   |
|------------------|-------------------------|----------|---------------------------|-----------|---------------------------|
| PKNOX1 <i>e!</i> | downstream gene variant | 4131     | ENST00000474336 <i>e!</i> | ?         | ?                         |
| PKNOX1 <i>e!</i> | downstream gene variant | 2581     | ENST00000560448 <i>e!</i> | ?         | ENSP00000453486 <i>e!</i> |
| PKNOX1 <i>e!</i> | downstream gene variant | 4037     | ENST00000607150 <i>e!</i> | ?         | ?                         |
| PKNOX1 <i>e!</i> | downstream gene variant | 2750     | ENST00000607049 <i>e!</i> | ?         | ?                         |
| PKNOX1 <i>e!</i> | downstream gene variant | 2963     | ENST00000557820 <i>e!</i> | ?         | ?                         |
| PKNOX1 <i>e!</i> | downstream gene variant | 2698     | ENST00000558955 <i>e!</i> | ?         | ?                         |

## Putative effect on transcript

## 3'-UTR variant

| gene             | affected transcript       | RefSeq id      | protein                   |
|------------------|---------------------------|----------------|---------------------------|
| PKNOX1 <i>e!</i> | ENST00000291547 <i>e!</i> | NM_004571.4    | ENSP00000291547 <i>e!</i> |
| PKNOX1 <i>e!</i> | ENST00000432907 <i>e!</i> | NM_001286258.1 | ENSP00000402243 <i>e!</i> |
