# Supplementary material
Source: PubMed Central journal article supplement (PMC5010494)
Supplement: NIHMS777012-supplement-4.pdf [file NIHMS777012-supplement-4.pdf]

Supplementary Table 3: rs915854 functional annotations

**SNiPAcard – rs915854**

SNP properties – Genome Assembly: grch37, Variant set: 1kgpp3v5, Population: EUR

**rs915854 (alias rs59918064)**

| position / outlink    |                   | allele info          |             |
|-----------------------|-------------------|----------------------|-------------|
| physical position     | chr21: 44,466,766 | alleles              | C/T         |
| genetic position [cM] | 57.37             | frequencies          | 0.541/0.459 |
| outlink               | <i>e!</i>         | non-reference allele | T           |

**Basic features**

| Conservation/deleteriousness |          | Linked genes                  |                                   |
|------------------------------|----------|-------------------------------|-----------------------------------|
| phyloP                       | 0.437    | gene(s) hit or close-by       | –                                 |
| phastCons                    | 0.004    | eQTL gene(s)                  | PKNOX1 <i>e!</i> , WDR4 <i>e!</i> |
| GERP++                       | 0.53     | potentially regulated gene(s) | –                                 |
| CADD score                   | 4.2      | disease gene(s)               | –                                 |
| SnEff effect impact          | modifier |                               |                                   |

**Direct effect on regulation****cis-eQTL**

| gene             | transcript | probe                     | tissue           | statistic (type)                | source                                                                                               |
|------------------|------------|---------------------------|------------------|---------------------------------|------------------------------------------------------------------------------------------------------|
| PKNOX1 <i>e!</i> | ?          | ENSG00000160199 <i>e!</i> | tibial nerve     | 1.87×10 <sup>-7</sup> (p-value) | GTEx Portal V6  |
| WDR4 <i>e!</i>   | ?          | ENSG00000160193 <i>e!</i> | esophagus mucosa | 6.87×10 <sup>-6</sup> (p-value) | GTEx Portal V6  |

**Putative effect on regulation****Regulatory feature cluster**

| element id                                              | tissue/cell                 | factors                      |
|---------------------------------------------------------|-----------------------------|------------------------------|
| ENSR00000614382 <i>e!</i><br>(promoter flanking region) | embryonic stem cell (H1ESC) | PoIII, Rad21                 |
|                                                         | HSMMtube                    | DNase1                       |
|                                                         | Osteobl                     | H3K4me2                      |
|                                                         | blood (DND-41)              | H3K4me1, H3K27ac, H3K9ac     |
|                                                         | skin (NHDF-AD)              | DNase1                       |
|                                                         | cervix (HeLa-S3)            | DNase1, Max, H3K27ac, H3K9ac |
|                                                         | monocytes (Monocytes-CD14+) | H3K4me1                      |
|                                                         | liver (HepG2)               | H3K4me2                      |
