# Supplementary material
Source: PubMed Central journal article supplement (PMC5010494)
Supplement: NIHMS777012-supplement-5.pdf [file NIHMS777012-supplement-5.pdf]

Supplementary Table 4: Candidate Gene SNPs in the IFM cohort

| SNP                   | Tag SNP <sup>a</sup> | R <sup>2</sup> | Gene                            | SNP type                                       | P-value |
|-----------------------|----------------------|----------------|---------------------------------|------------------------------------------------|---------|
| rs619824 <sup>b</sup> | -                    | -              | ( <i>CYP17A1</i> ) <sup>c</sup> | Intergenic (9kb downstream to <i>CYP17A1</i> ) | 0.043   |
| rs1799800             | rs6498486            | 1              | <i>ERCC4</i>                    | Intron                                         | 0.91    |
| rs1799801             | rs3136211            | 1              | <i>ERCC4</i>                    | Coding synonymous                              | 0.74    |
| rs2300697             | rs2300701            | 0.93           | <i>SRD5A2</i>                   | Intron                                         | 0.48    |
| rs1059293             | rs2186280            | 1              | <i>IFNGR2</i>                   | Untranslated, intron                           | 0.28    |
| rs2276583             | rs4150496            | 1              | <i>ERCC3</i>                    | Locus                                          | 0.45    |
| rs189037              | rs183460             | 1              | <i>ATM</i>                      | Locus, untranslated                            | 0.89    |
| rs10501815            | #N/A                 |                | <i>MRE11A</i>                   | Intron, TagSNP                                 |         |
| rs664677              | rs618499             | 1              | <i>ATM</i>                      | Intron                                         | 0.93    |
| rs664982              | rs227041             | 1              | <i>ATM</i>                      | Intron                                         | 0.71    |
| rs6131                | #N/A                 |                | <i>SELP</i>                     | Coding non-synonymous                          |         |
| rs1130499             | #N/A                 |                | <i>PTPRN2</i>                   | Coding non-synonymous                          |         |
| rs4722266             | #N/A                 |                | <i>STK31</i>                    | Coding non-synonymous                          |         |
| rs2267668             | #N/A                 |                | <i>PPARD</i>                    | Intron                                         |         |

<sup>a</sup>Tag SNP on the Affymetrix Human SNP6 Chip

<sup>b</sup>SNP associated with BiPN from Corthals et al., 2011 (8), other SNPs are associated with late-onset BiPN from Broyl et al., 2010 (10)

<sup>c</sup>rs619824 was relocated in the GRCh37/hg19 human genome assembly
